# Supplementary material for: Non-Structural Proteins (Nsp): A Marker for Detection of Human Coronavirus Families
Source: MDPI journal article supplement (doi:10.3390/pathogens12091185), 2023-09-21
Supplement: s1 [file s1]

# SUPPLEMENTARY INFORMATION

**Table S1.** Main types of coronaviruses that infect humans.

| Type coronavirus               | Accession               | Description/genome                                            | Length<br>genoma<br>(nt) | Protein | Host                                                        | 1ab polypeptide/<br>ORF1ab protein |
|--------------------------------|-------------------------|---------------------------------------------------------------|--------------------------|---------|-------------------------------------------------------------|------------------------------------|
| <i><b>Alphacoronavirus</b></i> |                         |                                                               |                          |         |                                                             |                                    |
| HCoV-229E                      | NC_002645               | Human coronavirus 229E                                        | 27317 nt                 | 8       | Human, vertebrates strain: 229E                             | NP_073549.1                        |
| HCoV-NL63                      | MG772808.1              | Human coronavirus NL63                                        | 27553 nt                 | 6       | Human strain: Amsterdam I                                   | AVA2672.1                          |
| <i><b>Betacoronavirus</b></i>  |                         |                                                               |                          |         |                                                             |                                    |
| HCoV-OC43                      | NC_006213               | Human coronavirus OC43                                        | 30741 nt                 | 10      | Human, vertebrates strain: ATCC VR-759; serotype: OC43      | YP_009555238.1                     |
| HCoV-HKU1                      | NC_006577               | Human coronavirus HKU1                                        | 29926 nt                 | 9       | Human isolate: HKU1                                         | YP_173236.1                        |
| MERS-CoV                       | NC_19843                | Middle East respiratory syndrome-related coronavirus          | 30119 nt                 | 11      | Human, vertebrates strain: HCoV-EMC; isolate: HCoV-EMC/2012 | YP_009047202.1                     |
| MERS-CoV-Eng                   | NC_038294               | Middle East respiratory syndrome-related coronavirus, England | 30111 nt                 | 11      | Human, vertebrates strain: England 1; isolate: H123990006   | YP_007188577.3                     |
| SARS-CoV                       | KY352407.1 <sup>a</sup> | Severe acute respiratory syndrome-related coronavirus         | 29274 bp                 | 10      | Human, vertebrates Strain: BtKY72                           | APO40578.1                         |

|                                            |            |                                                               |             |          |    |                                                                                  |                |
|--------------------------------------------|------------|---------------------------------------------------------------|-------------|----------|----|----------------------------------------------------------------------------------|----------------|
| SARS-CoV-2                                 | NC_045512  | Severe<br>respiratory<br>syndrome-related<br>coronavirus 2    | acute       | 29903 nt | 12 | Human, vertebrates<br>isolate: Wuhan-Hu-1                                        | YP_009724389.1 |
| SARS-CoV-Tor2                              | NC_04718   | Severe<br>respiratory<br>syndrome-related<br>coronavirus Tor2 | acute       | 29751 nt | 15 | Human<br>Isolate: patient #2 with<br>severe acute respiratory<br>syndrome (SARS) | NP_828849.7    |
| <b><i>Gammacoronavirus<sup>b</sup></i></b> |            |                                                               |             |          |    |                                                                                  | QDY92334.1     |
| AcCoV-Duck                                 | NC_048214  | Duck<br>coronavirus                                           | avian       | 27754 nt | 12 | Human, vertebrates<br>isolate:DK/GD/27/2014                                      | YP_009825006.1 |
| AcCoV- Turkey                              | NC_010800  | Turkey<br>coronavirus                                         | avian       | 27657 nt | 11 | Human, vertebrates<br>isolate: MG10                                              | YP_001941164.2 |
| <b><i>Deltacoronavirus<sup>c</sup></i></b> |            |                                                               |             |          |    |                                                                                  |                |
| Porcine<br>coronavirus                     | MW685622.1 | Porcine<br>HKU15                                              | coronavirus | 25444    | 1  | Porcine<br>Isolate:<br>PDCoV/Haiti/Human/0081-<br>4/2014                         | QWE80491.1     |
| Sparrow<br>deltacoronavirus                | MG812375   | Sparrow<br>deltacoronavirus<br>HKU17                          |             | 25795 nt | 9  | Passeridae<br>Isolate<br>PDCoV/Haiti/Human/0081-<br>4/2014                       | AWV67106.1     |

**a** Complete genomic sequence of BtKY72, which is closely related to BtCoV/BM48-31/ Bulgaria/2008, a severe acute respiratory syndrome (SARS)-related virus from *Rhinolophus* bats in Europe.

**b, c:** Group of coronaviruses with a route of transmission through birds and porcine.

**Table S2.** Proportion of homologous families of alpha, beta, gamma and delta coronaviruses.

| Genome                     | Genes | Genes<br>Homologs | Genes<br>Singletons | Homolog<br>Families |
|----------------------------|-------|-------------------|---------------------|---------------------|
| <i>Alphacoronavirus</i>    |       |                   |                     |                     |
| HCoV-229E (NC_002645)      | 7     | 2                 | 5                   | 2                   |
| HCoV-NL63 (MG772808.1)     | 6     | 2                 | 4                   | 2                   |
| <i>Betacoronavirus</i>     |       |                   |                     |                     |
| HCoV-OC43 (NC_006213)      | 7     | 5                 | 2                   | 5                   |
| HCoV-HKU1 (NC_006577)      | 8     | 5                 | 3                   | 5                   |
| MERS-CoV (NC_19843)        | 10    | 8                 | 2                   | 8                   |
| MERS-CoV-Eng (NC_038294)   | 9     | 9                 | 0                   | 9                   |
| SARS-CoV (KY352407.1)      | 10    | 7                 | 3                   | 7                   |
| SARS-CoV-2 (NC_045512)     | 11    | 8                 | 3                   | 8                   |
| SARS-CoV-Tor2 (NC_04718)   | 13    | 8                 | 5                   | 8                   |
| <i>Gammacoronavirus</i>    |       |                   |                     |                     |
| AcCoV-Duck (NC_048214)     | 12    | 7                 | 5                   | 6                   |
| AcCoV-Turkey (NC_010800)   | 11    | 7                 | 4                   | 6                   |
| <i>Deltacoronavirus</i>    |       |                   |                     |                     |
| Porcine HKU15 (MW685622.1) | 7     | 7                 | 0                   | 7                   |
| Sparrow HKU17 (MG812375)   | 9     | 7                 | 2                   | 7                   |

\*Functional families were calculated with Build Pangome with OrthoMCL (KBaseGenomes).

**Table S3.** Comparison families of alpha, beta, gamma and delta coronaviruses genomes

| Genome        | Families /Functions* |            |               |               |              |           |          |           |           |           |          |               |            |
|---------------|----------------------|------------|---------------|---------------|--------------|-----------|----------|-----------|-----------|-----------|----------|---------------|------------|
|               | AcCoV-Turkey         | AcCoV-Duck | Sparrow HKU17 | Porcine HKU15 | MERS-CoV-Eng | HCoV-229E | SARS-CoV | HCoV-HKU1 | HCoV-NL63 | HCoV-OC43 | MERS-CoV | SARS-CoV-Tor2 | SARS-CoV-2 |
| AcCoV-Turkey  | 10<br>11             | 6<br>10    | 2<br>3        | 2<br>3        | 1<br>0       | 2<br>3    | 1<br>0   | 1<br>2    | 2<br>4    | 1<br>3    | 0<br>4   | 0<br>2        | 0<br>2     |
| AcCoV-Duck    | 6<br>10              | 11<br>11   | 2<br>2        | 2<br>2        | 1<br>0       | 2<br>2    | 1<br>0   | 1<br>1    | 2<br>3    | 1<br>2    | 0<br>3   | 0<br>2        | 0<br>1     |
| Sparrow HKU17 | 2<br>3               | 2<br>2     | 9<br>9        | 7<br>6        | 1<br>0       | 2<br>3    | 1<br>0   | 1<br>2    | 2<br>3    | 1<br>3    | 0<br>3   | 0<br>2        | 0<br>1     |
| Porcine HKU15 | 2<br>3               | 2<br>2     | 7<br>6        | 7<br>7        | 1<br>0       | 2<br>3    | 1<br>0   | 1<br>2    | 2<br>3    | 1<br>3    | 0<br>3   | 0<br>2        | 0<br>1     |
| MERS-CoV-Eng  | 1<br>0               | 1<br>0     | 1<br>0        | 1<br>0        | 9<br>1       | 1<br>0    | 2<br>1   | 1<br>0    | 1<br>0    | 1<br>0    | 8<br>0   | 1<br>0        | 1<br>0     |
| HCoV-229E     | 2<br>3               | 2<br>2     | 2<br>3        | 2<br>3        | 1<br>0       | 7<br>8    | 1<br>0   | 1<br>1    | 2<br>4    | 1<br>3    | 0<br>3   | 0<br>1        | 0<br>2     |
| SARS-CoV      | 1<br>0               | 1<br>0     | 1<br>0        | 1<br>0        | 2<br>1       | 1<br>0    | 10<br>1  | 1<br>0    | 1<br>0    | 1<br>0    | 1<br>0   | 6<br>0        | 6<br>0     |
| HCoV-HKU1     | 1<br>2               | 1<br>1     | 1<br>2        | 1<br>2        | 1<br>0       | 1<br>1    | 1<br>0   | 8<br>9    | 1<br>1    | 5<br>1    | 0<br>1   | 0<br>3        | 0<br>5     |
| HCoV-NL63     | 2<br>4               | 2<br>3     | 2<br>3        | 2<br>3        | 1<br>0       | 2<br>4    | 1<br>0   | 1<br>1    | 6<br>6    | 1<br>3    | 0<br>4   | 0<br>1        | 0<br>1     |
| HCoV-OC43     | 1<br>3               | 1<br>2     | 1<br>3        | 1<br>3        | 1<br>0       | 1<br>3    | 1<br>0   | 5<br>1    | 1<br>3    | 8<br>8    | 0<br>3   | 0<br>1        | 0<br>1     |
| MERS-CoV      | 0<br>4               | 0<br>3     | 0<br>3        | 0<br>3        | 8<br>0       | 0<br>3    | 1<br>0   | 0<br>1    | 0<br>4    | 0<br>3    | 10<br>11 | 1<br>2        | 1<br>1     |
| SARS-CoV-Tor2 | 0<br>2               | 0<br>2     | 0<br>2        | 0<br>2        | 1<br>0       | 0<br>1    | 6<br>0   | 0<br>3    | 0<br>1    | 0<br>1    | 1<br>2   | 13<br>15      | 8<br>5     |

|            |        |        |        |        |        |        |        |        |        |        |        |        |          |
|------------|--------|--------|--------|--------|--------|--------|--------|--------|--------|--------|--------|--------|----------|
| SARS-CoV-2 | 0<br>2 | 0<br>1 | 0<br>1 | 0<br>1 | 1<br>0 | 0<br>2 | 6<br>0 | 0<br>5 | 0<br>1 | 0<br>1 | 1<br>1 | 8<br>5 | 11<br>12 |
|------------|--------|--------|--------|--------|--------|--------|--------|--------|--------|--------|--------|--------|----------|

*\*Functional families were calculated with Build Pangenome with OrthoMCL (KBaseGenomes).*

**Table S4.** Homologous families of Betacoronaviruses

| Genome        | Homolog families* |               |            |              |          |
|---------------|-------------------|---------------|------------|--------------|----------|
|               | MERS-CoV          | SARS CoV-Tor2 | SARS-CoV-2 | MERS-CoV-Eng | SARS-CoV |
| MERS-CoV      | 8                 | 1             | 1          | 8            | 1        |
| SARS CoV-Tor2 | 1                 | 8             | 8          | 1            | 6        |
| SARS-CoV-2    | 1                 | 8             | 8          | 1            | 6        |
| MERS-CoV-Eng  | 8                 | 1             | 1          | 9            | 2        |
| SARS-CoV      | 1                 | 6             | 6          | 2            | 7        |

*\*The functional families in betacoronaviruses were calculated with Build Pangenome with OrthoMCL (KBaseGenomes).*

**Table S5.** Identity analysis of the Nsp3

| Type coronavirus                     | Accession number | Identity (%) <sup>a</sup> | GMQE <sup>b</sup> | QMEAN <sup>c</sup> |
|--------------------------------------|------------------|---------------------------|-------------------|--------------------|
| <i>Alphacoronavirus</i>              |                  |                           |                   |                    |
| HCoV-229E                            | NP_073549.1      | 42.32%                    | 0.67              | 0.73 ± 0.05        |
| HCoV-NL63                            | YP_003766.2      | 42.32%                    | 0.68              | 0.73 ± 0.05        |
| <i>Betacoronavirus</i>               |                  |                           |                   |                    |
| HCoV-OC43                            | YP_009555238.1   | 29.24%                    | 0.71              | 0.70 ± 0.05        |
| HCoV-HKU1                            | YP_173236.1      | 31.42%                    | 0.65              | 0.69 ± 0.05        |
| MERS-CoV                             | YP_009047215.1   | 100.00%                   | 0.99              | 0.94 ± 0.05        |
| MERS-CoV-Eng                         | YP_009944294.1   | 99.37%                    | 0.98              | 0.94 ± 0.05        |
| SARS-CoV                             | AP040578.1       | 80.52%                    | 0.94              | 0.88 ± 0.05        |
| SARS-CoV-2                           | YP_009725299.1   | 99.67%                    | 0.98              | 0.91 ± 0.05        |
| SARS-CoV-Tor2                        | NP_828862.2      | 82.41%                    | 0.95              | 0.90 ± 0.05        |
| <i>Gammacoronavirus</i>              |                  |                           |                   |                    |
| AcCoV-Duck                           | YP_009825031.1   | 26.33%                    | 0.53              | 0.58 ± 0.05        |
| AcCoV- Turkey                        | YP_001941176.1   | 23.59%                    | 0.54              | 0.58 ± 0.05        |
| <i>Deltacoronavirus</i>              |                  |                           |                   |                    |
| Porcine<br>deltacoronavirus<br>HKU15 | QDH76194.1       | 20.20%                    | 0.10              | 0.51 ± 0.08        |
| Sparrow<br>deltacoronavirus<br>HKU17 | AWV67106.1       | 96.03%                    | 0.97              | 0.92 ± 0.07        |

<sup>a</sup>Target–template sequence similarity is calculated from a normalised BLOSUM62 substitution matrix.

<sup>b</sup>Qualitative model energy analysis.

<sup>c</sup>Global Model Quality Estimation.

**Table S6.** Identity analysis of the Nsp5

| Type coronavirus                     | Accession number | Identity (%) <sup>a</sup> | GMQE <sup>b</sup> | QMEAN <sup>c</sup> |
|--------------------------------------|------------------|---------------------------|-------------------|--------------------|
| <i>Alphacoronavirus</i>              |                  |                           |                   |                    |
| HCoV-229E                            | NP_073549.1      | 69.23%                    | 0.89              | 0.85 ± 0.05        |
| HCoV-NL63                            | YP_003766.2      | 69.10%                    | 0.90              | 0.87 ± 0.05        |
| <i>Betacoronavirus</i>               |                  |                           |                   |                    |
| HCoV-OC43                            | YP_009924323.1   | 43.71%                    | 0.81              | 0.80 ± 0.05        |
| HCoV-HKU1                            | YP_009944273.1   | 44.70%                    | 0.82              | 0.82 ± 0.05        |
| MERS-CoV                             | YP_009047217.1   | 47.68%                    | 0.82              | 0.80 ± 0.05        |
| MERS-CoV-Eng                         | YP_009944296.1   | 47.68%                    | 0.82              | 0.80 ± 0.05        |
| SARS-CoV                             | APO40578.1       | 95.30%                    | 0.95              | 0.87 ± 0.05        |
| SARS-CoV-2                           | YP_009725301.1   | 100.00%                   | 0.95              | 0.88 ± 0.05        |
| SARS-CoV-Tor2                        | NP_828849.7      | 100.00%                   | 0.96              | 0.88 ± 0.05        |
| <i>Gammacoronavirus</i>              |                  |                           |                   |                    |
| AcCoV-Duck                           | YP_009825033.1   | 43.30%                    | 0.78              | 0.77 ± 0.05        |
| AcCoV- Turkey                        | YP_001941178.1   | 41.58%                    | 0.78              | 0.79 ± 0.05        |
| <i>Deltacoronavirus</i>              |                  |                           |                   |                    |
| Porcine<br>deltacoronavirus<br>HKU15 | QWE80491.1       | 37.88%                    | 0.76              | 0.75 ± 0.05        |
| Sparrow<br>deltacoronavirus<br>HKU17 | AWV67106.1       | 38.23%                    | 0.76              | 0.75 ± 0.05        |

<sup>a</sup>Target–template sequence similarity is calculated from a normalised BLOSUM62 substitution matrix.

<sup>b</sup>Qualitative model energy analysis.

<sup>c</sup>Global Model Quality Estimation.

**Table S7.** Identity analysis of the Nsp6

| Type coronavirus                     | Accession number | Identity (%) <sup>a</sup> | GMQE <sup>b</sup> | QMEAN <sup>c</sup> |
|--------------------------------------|------------------|---------------------------|-------------------|--------------------|
| <i>Alphacoronavirus</i>              |                  |                           |                   |                    |
| HCoV-s-229E                          | NP_073549.1      | 47.37%                    | 0.00              | 0.47 ± 0.12        |
| HCoV-s-NL63                          | YP_003766.2      | 52.63%                    | 0.00              | 0.39 ± 0.12        |
| <i>Betacoronavirus</i>               |                  |                           |                   |                    |
| HCoV-s-OC43                          | YP_009555238.1   | 3.70%                     | 0.01              | 0.34 ± 0.12        |
| HCoV-s-HKU1                          | YP_173236.1      | 7.41%                     | 0.01              | 0.35 ± 0.12        |
| MERS-CoV                             | YP_009047202.1   | 3.70%                     | 0.01              | 0.30 ± 0.12        |
| MERS-CoV-Eng                         | YP_007188577.3   | 3.70%                     | 0.01              | 0.30 ± 0.12        |
| SARS-CoV                             | AP040578.1       | 7.69%                     | 0.00              | 0.33 ± 0.12        |
| SARS-CoV-2                           | YP_009724389.1   | 7.69%                     | 0.01              | 0.35 ± 0.12        |
| SARS-CoV-Tor2                        | NP_828849.7      | 12.00%                    | 0.00              | 0.17 ± 0.12        |
| <i>Gammacoronavirus</i>              |                  |                           |                   |                    |
| AcCoV-Duck                           | YP_009825007.1   | 7.41%                     | 0.01              | 0.33 ± 0.12        |
| AcCoV- Turkey                        | YP_001941164.2   | 11.11%                    | 0.01              | 0.34 ± 0.12        |
| <i>Deltacoronavirus</i>              |                  |                           |                   |                    |
| Porcine<br>deltacoronavirus<br>HKU15 | QWE80491.1       | 31.58%                    | 0.00              | 0.28 ± 0.12        |
| Sparrow<br>deltacoronavirus<br>HKU17 | AWV67106.1       | 31.58%                    | 0.00              | 0.33 ± 0.12        |

<sup>a</sup>Target–template sequence similarity is calculated from a normalised BLOSUM62 substitution matrix.

<sup>b</sup>Qualitative model energy analysis.

<sup>c</sup>Global Model Quality Estimation.



**Table S8.** Identity analysis of the Nsp9

| Type coronavirus                     | Accession number | Identity (%) <sup>a</sup> | GMQE <sup>b</sup> | QMEAN <sup>c</sup> |
|--------------------------------------|------------------|---------------------------|-------------------|--------------------|
| <i>Alphacoronavirus</i>              |                  |                           |                   |                    |
| HCoV-229E                            | NP_073549.1      | 45.87%                    | 0.61              | 0.58 ± 0.08        |
| HCoV-NL63                            | YP_003766.2      | 49.54%                    | 0.64              | 0.61 ± 0.08        |
| <i>Betacoronavirus</i>               |                  |                           |                   |                    |
| HCoV-OC43                            | YP_009555238.1   | 46.36%                    | 0.64              | 0.65 ± 0.06        |
| HCoV-HKU1                            | YP_173236.1      | 45.45%                    | 0.67              | 0.64 ± 0.06        |
| MERS-CoV                             | YP_009047202.1   | 52.73%                    | 0.69              | 0.66 ± 0.06        |
| MERS-CoV-Eng                         | YP_007188577.3   | 53.64%                    | 0.70              | 0.65 ± 0.06        |
| SARS-CoV                             | APO40578.1       | 98.23%                    | 0.82              | 0.80 ± 0.06        |
| SARS-CoV-2                           | YP_009724389.1   | 40.54%                    | 0.68              | 0.68 ± 0.06        |
| SARS-CoV-Tor2                        | NP_828849.7      | 100.00%                   | 0.86              | 0.80 ± 0.06        |
| <i>Gammacoronavirus</i>              |                  |                           |                   |                    |
| AcCoV-Duck                           | YP_009825037.1   | 40.54%                    | 0.68              | 0.68 ± 0.06        |
| AcCoV- Turkey                        | YP_001941182.1   | 40.54%                    | 0.66              | 0.66 ± 0.06        |
| <i>Deltacoronavirus</i>              |                  |                           |                   |                    |
| Porcine<br>deltacoronavirus<br>HKU15 | QWE80491.1       | 36.11%                    | 0.58              | 0.59 ± 0.06        |
| Sparrow<br>deltacoronavirus<br>HKU17 | AWV67106.1       | 35.19%                    | 0.54              | 0.55 ± 0.06        |

<sup>a</sup>Target–template sequence similarity is calculated from a normalised BLOSUM62 substitution matrix.

<sup>b</sup>Qualitative model energy analysis.

<sup>c</sup>Global Model Quality Estimation.

**Table S9.** Identity analysis of the RNA-dependent RNA polymerase Rdpd (Nsp12)

| Type coronavirus                     | Accession number | Identity (%) <sup>a</sup> | GMQE <sup>b</sup> | QMEAN <sup>c</sup> |
|--------------------------------------|------------------|---------------------------|-------------------|--------------------|
| <i>Alphacoronavirus</i>              |                  |                           |                   |                    |
| HCoV-229E                            | NP_073549.1      | 58.86%                    | 0.81              | 0.74 ± 0.05        |
| HCoV-NL63                            | YP_003766.2      | 58.96%                    | 0.79              | 0.72 ± 0.05        |
| <i>Betacoronavirus</i>               |                  |                           |                   |                    |
| HCoV-OC43                            | YP_009555260.1   | 72.73%                    | 0.85              | 0.78 ± 0.05        |
| HCoV-HKU1                            | YP_459941.1      | 73.32%                    | 0.84              | 0.77 ± 0.05        |
| MERS-CoV                             | YP_009047223.1   | 75.71%                    | 0.86              | 0.80 ± 0.05        |
| MERS-CoV-Eng                         | YP_009944302.1   | 75.71%                    | 0.86              | 0.80 ± 0.05        |
| SARS-CoV                             | AP040578.1       | 95.68%                    | 0.87              | 0.82 ± 0.05        |
| SARS-CoV-2                           | YP_009725307.1   | 99.85%                    | 0.88              | 0.83 ± 0.05        |
| SARS-CoV-Tor2                        | NP_828849.7      | 96.57%                    | 0.86              | 0.81 ± 0.05        |
| <i>Gammacoronavirus</i>              |                  |                           |                   |                    |
| AcCoV-Duck                           | YP_009825029.1   | 66.72%                    | 0.81              | 0.73 ± 0.05        |
| AcCoV- Turkey                        | YP_001941185.1   | 66.12%                    | 0.80              | 0.71 ± 0.05        |
| <i>Deltacoronavirus</i>              |                  |                           |                   |                    |
| Porcine<br>deltacoronavirus<br>HKU15 | QWE80491.1       | 52.41%                    | 0.80              | 0.73 ± 0.05        |
| Sparrow<br>deltacoronavirus<br>HKU17 | AWV67106.1       | 53.28%                    | 0.75              | 0.71 ± 0.05        |

<sup>a</sup>Target–template sequence similarity is calculated from a normalised BLOSUM62 substitution matrix.

<sup>b</sup>Qualitative model energy analysis.

<sup>c</sup>Global Model Quality Estimation.

**Table S10.** Identity analysis of the Nsp13

| Type coronavirus               | Accession number | Identity (%) <sup>a</sup> | GMQE <sup>b</sup> | QMEAN <sup>c</sup> |
|--------------------------------|------------------|---------------------------|-------------------|--------------------|
| <i>Alphacoronavirus</i>        |                  |                           |                   |                    |
| HCoV-229E                      | NP_073549.1      | 62.83%                    | 0.78              | 0.76 ± 0.05        |
| HCoV-NL63                      | YP_003766.2      | 63.42%                    | 0.79              | 0.76 ± 0.05        |
| <i>Betacoronavirus</i>         |                  |                           |                   |                    |
| HCoV-OC43                      | YP_009555238.1   | 69.16%                    | 0.77              | 0.75 ± 0.05        |
| HCoV-HKU1                      | YP_459942.1      | 68.26%                    | 0.78              | 0.76 ± 0.05        |
| MERS-CoV                       | YP_009047224.1   | 100.00%                   | 0.74              | 0.67 ± 0.05        |
| MERS-CoV-Eng                   | YP_009944303.1   | 99.83%                    | 0.74              | 0.67 ± 0.05        |
| SARS-CoV                       | AP040578.1       | 72.35%                    | 0.82              | 0.81 ± 0.05        |
| SARS-CoV-2                     | YP_009725308.1   | 73.01%                    | 0.80              | 0.81 ± 0.05        |
| SARS-CoV-Tor2                  | NP_828849.7      | 72.37%                    | 0.81              | 0.81 ± 0.05        |
| <i>Gammacoronavirus</i>        |                  |                           |                   |                    |
| AcCoV-Duck                     | YP_009825025.1   | 62.43%                    | 0.76              | 0.73 ± 0.05        |
| AcCoV- Turkey                  | YP_001941186.1   | 59.88%                    | 0.76              | 0.73 ± 0.05        |
| <i>Deltacoronavirus</i>        |                  |                           |                   |                    |
| Porcine coronavirus HKU15      | QWE80491.1       | 58.10%                    | 0.74              | 0.74 ± 0.05        |
| Sparrow deltacoronavirus HKU17 | AWV67106.1       | 58.41%                    | 0.74              | 0.74 ± 0.05        |

<sup>a</sup>Target–template sequence similarity is calculated from a normalised BLOSUM62 substitution matrix.

<sup>b</sup>Qualitative model energy analysis.

<sup>c</sup>Global Model Quality Estimation.

**Table S11.** Identity analysis of the Nsp14

| Type coronavirus               | Accession number | Identity (%) <sup>a</sup> | GMQE <sup>b</sup> | QMEAN <sup>c</sup> |
|--------------------------------|------------------|---------------------------|-------------------|--------------------|
| <i>Alphacoronavirus</i>        |                  |                           |                   |                    |
| HCoV-229E                      | NP_073549.1      | 54.04%                    | 0.80              | 0.72 ± 0.05        |
| HCoV-NL63                      | YP_003766.2      | 54.15%                    | 0.79              | 0.72 ± 0.05        |
| <i>Betacoronavirus</i>         |                  |                           |                   |                    |
| HCoV-OC43                      | YP_009555238.1   | 58.33%                    | 0.81              | 0.73 ± 0.05        |
| HCoV-HKU1                      | YP_173236.1      | 57.56%                    | 0.82              | 0.73 ± 0.05        |
| MERS-CoV                       | YP_009047202.1   | 63.57%                    | 0.82              | 0.75 ± 0.05        |
| MERS-CoV-Eng                   | YP_007188577.3   | 63.57%                    | 0.82              | 0.75 ± 0.05        |
| SARS-CoV                       | AP040578.1       | 52.54%                    | 0.78              | 0.71 ± 0.05        |
| SARS-CoV-2                     | YP_009724389.1   | 93.67%                    | 0.89              | 0.83 ± 0.05        |
| SARS-CoV-Tor2                  | NP_828849.7      | 99.81%                    | 0.90              | 0.84 ± 0.05        |
| <i>Gammacoronavirus</i>        |                  |                           |                   |                    |
| AcCoV-Duck                     | YP_009825006.1   | 52.34%                    | 0.78              | 0.70 ± 0.05        |
| AcCoV- Turkey                  | YP_001941164.2   | 99.81%                    |                   |                    |
| <i>Deltacoronavirus</i>        |                  |                           |                   |                    |
| Porcine coronavirus HKU15      | QWE80491.1       | 43.82%                    | 0.78              | 0.68 ± 0.05        |
| Sparrow deltacoronavirus HKU17 | AWV67106.1       | 43.82%                    | 0.79              | 0.68 ± 0.05        |

<sup>a</sup>Target–template sequence similarity is calculated from a normalised BLOSUM62 substitution matrix.

<sup>b</sup>Qualitative model energy analysis.

<sup>c</sup>Global Model Quality Estimation.

**Table S12.** Sequences included to obtain the consensus sequence of *Nsp3*.

| <b>Dominio Conservado (CDD)</b> | <b>Conserved Protein Domain Family</b>                 | <b>Accession number*</b>                                                                                                                                                                                                                                                                                                                                                                                                                                                       | <b>Length sequence consensus (aa)</b> |
|---------------------------------|--------------------------------------------------------|--------------------------------------------------------------------------------------------------------------------------------------------------------------------------------------------------------------------------------------------------------------------------------------------------------------------------------------------------------------------------------------------------------------------------------------------------------------------------------|---------------------------------------|
| cd21731                         | alphaCoV_PLPro (alphacoronavirus papain-like protease) | YP_003766.2, NP_073549.1, ALK43113.1, YP_009380519.1, APD51481.1, P0C6X5.1, ALK43114.1, P0C6X1.1, AYR18429.1, AYH64860.2, QER90703.1, AOV85633.1, QBP43277.1, QDF43809.1, QCX35166.1, P0C6V6.1, AIA62211.1, AIA62270.1, ABI14446.1, ASU62498.1, AMD11206.1, AZF86129.1, ASL24651.1, ADI80521.1, ASF90485.1, AIA62233.1, AZF86117.1, YP_009201729.1, AVY53334.1, AFU92112.1, ASL24650.1, AFU92077.1, AFH58022.1, BBA21166.1, YP_009380519.1                                     | 289                                   |
| cd21732                         | betaCoV_PLPro (betacoronavirus papain-like protease)   | YP_009555238.1, YP_173236.1, NP_828862.2, YP_009725299.1, YP_009047215.1, YP_009944294.1, YP_001941176.1, YP_001941176.1, YP_009555258.1, YP_009924321.1, YP_009742610.1, YP_009725299.1, YP_009742610.1, NP_828862.2, YP_009944368.1, YP_460024.1, YP_009944271.1, YP_009047215.1, YP_009047231.1, YP_009944294.1, YP_009944283.1, 3MJ5_A, QHD43415.1, 3MJ5_A, 5W8T_A, 4REZ_A, AYR18613.1, AVV62524.1, AVV62535.1, AYR18649.1, AUM60013.1, APO40578.1, AIG13097.1, AJA91204.1 | 304                                   |
| cd21733                         | gammaCoV_PLPro (gammacoronavirus)                      | YP_009825031.1, YP_001941176.1, AHB63480.1, YP_001876435.1, ABW75136.1, APP92719.1, QDA76254.1, AVI69518.1,                                                                                                                                                                                                                                                                                                                                                                    | 304                                   |

|         |                                                                 |                                                                                                                                                                                                                                                                                                                                                        |     |
|---------|-----------------------------------------------------------------|--------------------------------------------------------------------------------------------------------------------------------------------------------------------------------------------------------------------------------------------------------------------------------------------------------------------------------------------------------|-----|
|         | papain-like<br>protease)                                        | ADV71748.1, CEK09107.1, QDY92334.1,<br>QCB65096.1, QDQ69120.1, ACV87256.1,<br>QDQ69094.1, AQY55829.1, AXB38893.1,<br>ARJ35781.1, ADV71811.1, ALQ43513.1,<br>AKF17723.1, ACV87267.1                                                                                                                                                                     |     |
| cd21734 | deltaCoV_PLPro<br>(deltacoronavirus<br>papain-like<br>protease) | QDH76194.1, YP_005352853.1, AXP32229.1,<br>AWV96579.1, ATJ00129.1, BAZ95608.1,<br>YP_005352845.1, AWV67124.1, AWV67133.1,<br>BBC54860.1, BBC54851.1, AXP20280.1,<br>YP_002308505.1, ACJ12043.1,<br>YP_002308496.1, BBC54841.1, BBC54831.1,<br>BBC54821.1, YP_005352862.1, AWR88311.1,<br>AUG59154.1, YP_005352837.1,<br>YP_005352880.1, YP_005352870.1 | 313 |

\*Accession number of viral representatives of each taxonomic group was obtained from the NCBI (Conserved Protein Domain Family) database.

**Table S13.** Sequences included to obtain the consensus sequence of Nsp5

| <b>Dominio Conservado (CDD)</b> | <b>Conserved Protein Domain Family</b>                                                           | <b>Accession number</b>                                                                                                                                                                                                                                                                                                                                  | <b>Length sequence consensus (aa)</b> |
|---------------------------------|--------------------------------------------------------------------------------------------------|----------------------------------------------------------------------------------------------------------------------------------------------------------------------------------------------------------------------------------------------------------------------------------------------------------------------------------------------------------|---------------------------------------|
| cd21665                         | alphaCoV_Nsp5_Mpro (alphacoronavirus non-structural protein 5, also called Main protease (Mpro)) | NP_073549.1, YP_003766.2, 5GWY_A, 3TLO_A, 1LVO_A, 5NH0_A, 2ZU2_A, 1P9S_A, 5EU8_A, 4F49_A, 5ZQG_A, 4ZRO_A, ASF90469.1, QER90703.1, AID16674.1, AIA62211.1, AFU92103.1, AID16670.1, ASR18936.1, QCX35159.1, ADI80522.1, AID16673.1, APD51489.1, AZF86129.1, ABQ57215.1, AZF86117.1, AIA62270.1, AJP67437.1, ASL24651.1, ATP66788.1, ATP66783.1, QBP43277.1 | 296                                   |
| d21666                          | betaCoV_Nsp5_Mpro (betacoronavirus non-structural protein 5, also called Main protease (Mpro))   | APO40578.1, YP_009725301.1, NP_828849.7, YP_009924323.1, YP_009944273.1, YP_009047217.1, YP_009944296.1, 3D23_B, 6M2N_A, 6JIJ_B, 2A5K_A, 1WOF_A, 3ATW_A, 4MDS_A, 4YLU_A, 5WKJ_A, 1Q2W_A, 1UJ1_A, 1Z1J_A, 2PWX_A, 2Q6G_A, 3E91_A, 3M3T_A, 4HI3_A, 5B6O_A, AID16629.1, AGT28265.1, QGA70691.1, AOG30811.1,                                                 | 297                                   |

|         |                                                                                                              |                                                                                                                                                                                                                                                                                                                                                                                                                                                                                                    |     |
|---------|--------------------------------------------------------------------------------------------------------------|----------------------------------------------------------------------------------------------------------------------------------------------------------------------------------------------------------------------------------------------------------------------------------------------------------------------------------------------------------------------------------------------------------------------------------------------------------------------------------------------------|-----|
|         |                                                                                                              | ADY69163.1, YP_009072438.1,<br>AWV67038.1, 6JII_B, 2YNA                                                                                                                                                                                                                                                                                                                                                                                                                                            |     |
| cd21667 | gammaCoV_Nsp5_Mpro<br>(gammacoronavirus non-<br>structural protein 5, also<br>called Main protease<br>(Mpro) | YP_009825033.1, YP_001941178.1,<br>2Q6D_A, QCE31532.1,<br>AAW33784.1, AZP23929.1,<br>AHB63507, QCB65096.1,<br>AKQ98469.1, AKQ98473.1,<br>NP_040829.1, NP_066134.1,<br>QEG79146.1, ALQ43513.1,<br>CAC39112.1, ACV87243.1,<br>ANY58999.1, ARJ35781.1,<br>QDA76254.1, QDA76263.1,<br>ABW75124.1, ARJ35790.1,<br>CAZ86698.1, CAZ86697.1,<br>CEK09106.1, NP_740623.1,<br>AKQ98471.1, AKF17722.1,<br>ATE90965.1, ATE90966.1,<br>QCB65092.1, YP_001941178.1,<br>AHB63480.1, YP_001876436.1,<br>AXF38647.1 | 306 |
| cd21668 | deltaCoV_Nsp5_Mpro<br>(deltacoronavirus non-<br>structural protein 5, also<br>called Main protease<br>(Mpro) | BBC54821.1, YP_005352862.1,<br>AWR88311.1, APZ76696.1,<br>ACJ12043.1, YP_005352880.1,<br>YP_005352870.1                                                                                                                                                                                                                                                                                                                                                                                            | 302 |

\*Accession number of viral representatives of each taxonomic group was obtained from the NCBI (Conserved Protein Domain Family) database.



**Table S14.** Sequences included to obtain the consensus sequence of Nsp6

| <b>Dominio Conservado (CDD)</b> | <b>Conserved Protein Domain Family</b>                       | <b>Accession number</b>                                                                                                                                                                                                                                                                                                                                                                                                                                                      | <b>Length sequence consensus (aa)</b> |
|---------------------------------|--------------------------------------------------------------|------------------------------------------------------------------------------------------------------------------------------------------------------------------------------------------------------------------------------------------------------------------------------------------------------------------------------------------------------------------------------------------------------------------------------------------------------------------------------|---------------------------------------|
| cd21558                         | alphaCoV-Nsp6<br>(alphacoronavirus non-structural protein 6) | NP_073549.1, YP_003766.2, ANA96047.1, AID16670.1, AIA62270.1, QBP43254.1, AFU92103.1, ALK43113.1, YP_009328933.1, APD51481.1, AYR18486.1, AID16674.1, QER90703.1, QCX35177.1, QBP43266.1, QBP43288.1, YP_009199608.1, ACA52156.1, ASL24651.1, ARI44793.1, QCX35159.1, AIA62233.1, AID16673.1, AVM80482.1, AIA62211.1, YP_009201729.1, ADI80522.1, AZF86117.1, AZF86129.1, ATP66737.1, YP_009380519.1, ACT10853.1, ATP66783.1, AVM87573.1, ASF90443.1, ASF90485.1, ASF90469.1 | 293                                   |
| cd21560                         | betaCoV-Nsp6<br>(betacoronavirus non-structural protein 6)   | YP_009555238.1, YP_173236.1, YP_009047202.1, YP_007188577.3, YP_009724389.1, NP_828849.7, APO40578.1, YP_009742613.1, ATP66760.1, ASL68951.1, YP_009361855.1, APO40578.1, ATQ39389.1, AUM60023.1, AVV62524.1, YP_003858583.1, ATP66754.1, AYR18613.1,                                                                                                                                                                                                                        | 290                                   |

|         |               |                                                                                                                                                                                                                                                         |     |
|---------|---------------|---------------------------------------------------------------------------------------------------------------------------------------------------------------------------------------------------------------------------------------------------------|-----|
|         |               | BBJ36006.1, ATP66777.1,<br>ABN10918.1, ADM33573.1,<br>QEH60462.1, QGA70691.1,<br>AOG30811.1, AWV67038.1,<br>ADY69163.1, AJA91204.1,<br>AFE48810.1, ATP66742.1,<br>AGT28265.1, AVP25405.1,<br>YP_009072438.1                                             |     |
| cd21559 | gammaCoV-Nsp6 | YP_009825007.1, YP_001941164.2,<br>QDY92358.1, QDY92334.1,<br>QEG79146.1, QCB65096.1,<br>AHB63480.1, QDQ69197.1,<br>QDQ69171.1                                                                                                                          | 307 |
| cd21561 | deltaCoV-Nsp6 | YP_009513020.1, YP_005352837.1,<br>YP_005352880.1, AMN91620.1,<br>YP_002308505.1, BBC54821.1,<br>AWV67106.1, YP_002308496.1,<br>ACJ12043.1, YP_002308478.1,<br>AWV67124.1, YP_005352845.1,<br>YP_005352853.1, AXP20280.1,<br>AWR88311.1, YP_005352870.1 | 296 |

---

\*Accession number of viral representatives of each taxonomic group was obtained from the NCBI (Conserved Protein Domain Family) database.

**Table S15.** Sequences included to obtain the consensus sequence of Nsp9

| <b>Dominio Conservado (CDD)</b> | <b>Conserved Protein Domain Family</b>                  | <b>Accession number</b>                                                                                                                                                                                                                                                                                                                                                                                                                                                                                                                                                                                                      | <b>Length sequence consensus (aa)</b> |
|---------------------------------|---------------------------------------------------------|------------------------------------------------------------------------------------------------------------------------------------------------------------------------------------------------------------------------------------------------------------------------------------------------------------------------------------------------------------------------------------------------------------------------------------------------------------------------------------------------------------------------------------------------------------------------------------------------------------------------------|---------------------------------------|
| cd21897                         | CoV-Nsp9 (coronavirus non-structural protein 9)         | YP_003766.2, NP_073549.1, AID16671.1, ASF90443.1, ASL24651.1, AZF86129.1, YP_009201729.1, ANA96047.1, QBP43288.1, AZF86117.1, QBP43266.1, AID16669.1, QCX35166.1, AOG74788.1, AFU92077.1, AID16674.1, APD51505.1, APD51497.1, ALK43115.1, ALK43113.1, AJP67413.1, ACI13472.1, QER90703.1, ACI13440.1, APD51489.1, AYH64861.2, QCX35159.1, AID16673.1, ARI44793.1, AYR18560.1, AYR18498.1, QDM36985.1, YP_009200734.1, AVM80473.1, AID16670.1, ASF90459.1, AGZ84525.1, ASF90469.1, ACT10915.1, YP_009256195.1, BBA21166.1, ATP66737.1, YP_009380519.1, QDF43809.1, AIA62211.1, AIA62226.1, AIA62205.1, ACA52156.1, AVY53334.1 | 108                                   |
| cd21898                         | betaCoV_Nsp9 (betacoronavirus non-structural protein 9) | YP_009555238.1, YP_173236.1, YP_009047202.1, YP_007188577.3,                                                                                                                                                                                                                                                                                                                                                                                                                                                                                                                                                                 | 111                                   |

|         |                                                                  |                                                                                                                                                                                                                                                                                                                                          |     |
|---------|------------------------------------------------------------------|------------------------------------------------------------------------------------------------------------------------------------------------------------------------------------------------------------------------------------------------------------------------------------------------------------------------------------------|-----|
|         |                                                                  | YP_009724389.1, NP_828849.7,<br>APO40578.1, YP_009072438.1,<br>BBJ36006.1, ASL68940.1,<br>ANA96038.1, AVV62524.1,<br>AVV62535.1, ABN10918.1,<br>QGA70691.1, QEH60462.1,<br>AVP25405.1, AGT28265.1,<br>AOG30811.1, AWV67038.1,<br>AID16712.1, ATP66754.1,<br>ATP66760.1, ATP66742.1,<br>ATP66748.1, ATP66777.1,<br>ATP66731.1, AZU96324.1 |     |
| cd21899 | gammaCoV_Nsp9<br>(gammacoronavirus non-<br>structural protein 9) | YP_009825037.1,<br>YP_001941182.1,<br>AHB63480.1, AFJ11174.1,<br>QCB65092.1, AGK85497.1,<br>ARS22408.1, AEP84744.1,<br>QDY92334.1, ADV71798.1,<br>QDA76290.1                                                                                                                                                                             | 113 |
| cd21900 | deltaCoV_Nsp9<br>(deltacoronavirus non-<br>structural protein 9) | YP_005352862.1, AWR88311.1,<br>AXP20280.1, AWV67124,<br>YP_002308505, ACJ12043                                                                                                                                                                                                                                                           | 109 |

\*Accession number of viral representatives of each taxonomic group was obtained from the NCBI (Conserved Protein Domain Family) database.

**Table S16.** Sequences included to obtain the consensus sequence of RNA-dependent RNA polymerase Rdpd (Nsp12)

| <b>Dominio Conservado (CDD)</b> | <b>Conserved Protein Domain Family</b> | <b>Accession number</b>                                                                                                                                                                                                                                                                                                                                                                                                                                                                                                                                                                                                                                                                                                                                                                            | <b>Length sequence consensus (aa)</b> |
|---------------------------------|----------------------------------------|----------------------------------------------------------------------------------------------------------------------------------------------------------------------------------------------------------------------------------------------------------------------------------------------------------------------------------------------------------------------------------------------------------------------------------------------------------------------------------------------------------------------------------------------------------------------------------------------------------------------------------------------------------------------------------------------------------------------------------------------------------------------------------------------------|---------------------------------------|
| cd21588                         | alphaCoV_RdRp                          | YP 003766.2, NP 073549.1, AVA26872.1, AIA62219.1, AXE71622.1, ADX59465.1, ADX59457.1, QBP43277.1, QCX35166.1, AZF86117.1, QDF43809.1, YP_009201729.1, AIA62270.1, YP_009199608.1, AIA62199.1, ASF90474.1, ASF90495.1, ASF90459.1, ASF90443.1, ARI44788.1, AID16673.1, APD51489.1, AFU92130.1, AMC39583.1, QBP43288.1, AKJ21970.1, AZF86129.1, Q98VG9.2 (R1AB_FIPV), ANA96047.1, P0C6Y5.1 (R1AB_CVPPU), AJO27002.1, AVY53334.1, AYR18560.1, QCX35159.1, ABQ57215.1, ALK43113.1, ADX59494.1, APD51505.1, AIA62211.1, AYF53092.1, YP_009328933.1, YP_009256195.1, ADX59487.1, AID16670.1, AMB42807.1, AID16669.1, AKZ66481.1, ACA52156.1, QDF43789.1, AYH64861.2, NP_073549.1, AID16547.1, ASL24651.1, QER90703.1, ADX59501.1, ABB77038.1, QBM00060.1, AQK38167.1, ATP66737.1, ATP66788.1, ATP66783.1 | 924                                   |
| cd21589                         | betaCoV_RdRp                           | NP 073549.1, YP 009944302.1, YP 009725307.1, NP 828849.7, APO40578.1, YP 009555260.1, YP 459941.1, 7BTF_A,                                                                                                                                                                                                                                                                                                                                                                                                                                                                                                                                                                                                                                                                                         | 929                                   |

|         |               |                                                                                                                                                                                                                                                                                                                                                                                                                                                                                                                                                                              |     |
|---------|---------------|------------------------------------------------------------------------------------------------------------------------------------------------------------------------------------------------------------------------------------------------------------------------------------------------------------------------------------------------------------------------------------------------------------------------------------------------------------------------------------------------------------------------------------------------------------------------------|-----|
|         |               | P0C6X4.1 (R1AB_CVHN5),<br>YP_009072438.1, ATQ39389.1,<br>ABN10934.1                                                                                                                                                                                                                                                                                                                                                                                                                                                                                                          |     |
| cd21587 | gammaCoV_RdRp | YP 459941.1, YP 009825029.1,<br>AHB73997.1, P0C6Y3.1 (R1AB_IBVM),<br>AVI69484.1, ACH72802.1, P0C6Y1.1<br>(R1AB_IBVB), ACC94324.1, ABW75136.1,<br>AKQ98476.1, AAP92673.1, ACV87266.1<br>QDA76263.1, ARB66179.1, AXB38892.1,<br>APZ73705.1, ARS23151.1, AIG54294.1,<br>AOC59721.1, QDY92334.1, AAQ21583.1,<br>AMD40261.1, AXT92414.1, QDQ69132.1,<br>QDQ69106.1, APP92719.1, QDQ69145.1,<br>AKQ98478.1, QDQ69158.1, AGW81826.1,<br>AKF17722.1, ARJ35781.1, AJT47940.1,<br>AGK85497.1, APY23514.1, APP92727.1,<br>QCB65096.1, CAA83018.1, AKV63203.1,<br>AVI69518.1, AHB63507.1 | 931 |
| cd21590 | deltaCoV_RdRp | AWV67106.1, AWV67124.1, BBC54860.1,<br>ANI85845.1, ACJ12043.1, BBC54841.1,<br>YP_002308496.1, AWV67133.1,<br>YP_002308505.1, AXP20280.1<br>AML40817.1, BBC54831.1, ASR75138.1,<br>YP_005352845.1, AMN91620.1,<br>BBC54851.1, YP_005352862.1,<br>YP_005352853.1, YP_005352837.1,<br>YP_005352880.1, YP_002308478.1,<br>YP_005352870.1, AWV96565.1                                                                                                                                                                                                                             | 928 |

\*Accession number of viral representatives of each taxonomic group was obtained from the NCBI (Conserved Protein Domain Family) database.

**Table S17.** Sequences included to obtain the consensus sequence of Nsp13

| <b>Dominio Conservado (CDD)</b> | <b>Conserved Protein Domain Family</b>                                                  | <b>Accession number</b>                                                                                                                                                                                                                                                                                                                                                                                                                                    | <b>Length sequence consensus (aa)</b> |
|---------------------------------|-----------------------------------------------------------------------------------------|------------------------------------------------------------------------------------------------------------------------------------------------------------------------------------------------------------------------------------------------------------------------------------------------------------------------------------------------------------------------------------------------------------------------------------------------------------|---------------------------------------|
| cd21723                         | alphaCoV_Nsp13-helicase (helicase domain of alphacoronavirus non-structural protein 13) | NP_073549.1, YP_003766.2, P0C6X5.1, QBP43288.1, APD51489.1, YP_009328933.1, QDF43809.1, AIA62199.1, AFU92112.1, ADX59465.1, ADX59494.1, AYR18560.1, AEK25510.1, ADX59501.1, QER90703.1, AYH64861.2, ADX59457.1, ARI44788.1, ADX59487.1, AVY53334.1, AIA62270.1, BAV31348.1, ATP66737.1, ABB77061.1, AVM80473.1, ASL24651.1, AIA62233.1, AZF86117.1, AKZ66481.1, YP_009201729.1, ABO88147.1, YP_009380520.1, AYR18518.1, AID16669.1, ASF90474.1, ATP66783.1 | 340                                   |
| cd21722                         | betaCoV_Nsp13-helicase (helicase domain of betacoronavirus non-structural protein 13)   | YP_009555238.1, YP_459942.1, YP_009047224.1, YP_009944303.1, YP_009725308.1, APO40578.1, NP_828849.7, QHD43415.1, AUM60023.1, AYR18640.1, AYR18613.1, 6JYT_A, 5WWP_B, ADY69164.1, QDF43839.1, YP_009072438.1, AOG30811.1, BBJ36006.1,                                                                                                                                                                                                                      | 340                                   |

|         |                                                                                                       |                                                                                                                                                               |     |
|---------|-------------------------------------------------------------------------------------------------------|---------------------------------------------------------------------------------------------------------------------------------------------------------------|-----|
|         |                                                                                                       | ABN10892.1, AUM60023.1,<br>ADX59473.1, QGA70691.1,<br>QCC20711.1, ATP66731.1,<br>AYR18596.1, ATP66742.1,<br>AFE48822.1                                        |     |
| cd21720 | gammaCoV_Nsp13-<br>helicase (helicase<br>domain of<br>gammacoronavirus non-<br>structural protein 13) | YP_009825025.1,<br>YP_001941186.1, AHB63507.1,<br>AKF17722.1, QCB65096.1,<br>AGK85497.1, AKQ98482.1,<br>APY26727.1, ADP06517.1,<br>ADV71748.1, AKV63203.1     | 343 |
| cd21721 | deltaCoV_Nsp13-<br>helicase (helicase<br>domain of<br>deltacoronavirus non-<br>structural protein 13) | ACJ12043.1, YP_002308496.1,<br>YP_005352837.1,<br>YP_002308505.1,<br>YP_005352880.1, BBC54821.1,<br>AWV67106.1, YP_005352870.1,<br>YP_005352862.1, AWR88314.1 | 342 |

\*Accession number of viral representatives of each taxonomic group was obtained from the NCBI (Conserved Protein Domain Family) database.



**Table S18.** Sequences included to obtain the consensus sequence of Nsp14

| <b>Dominio Conservado (CDD)</b> | <b>Conserved Protein Domain Family</b>                           | <b>Accession number</b>                                                                                                                                                                                                                                                                                                                                                                                                                                                                                                                                               | <b>Length sequence consensus (aa)</b> |
|---------------------------------|------------------------------------------------------------------|-----------------------------------------------------------------------------------------------------------------------------------------------------------------------------------------------------------------------------------------------------------------------------------------------------------------------------------------------------------------------------------------------------------------------------------------------------------------------------------------------------------------------------------------------------------------------|---------------------------------------|
| cd21660                         | alphaCoV_Nsp14<br>(nonstructural protein 14 of alphacoronavirus) | NP_073549.1, YP_003766.2, YP_009380520.1, ACA52156.1, AID16673.1, AFU92103.1, YP_009328933.1, ANA96047.1, ASL24651.1, AIA62233.1, AYR18435.1, ADR79379.1, AYH64858.2, AID16669.1, APD51497.1, ADX59457.1, AZF86123.1, AZF86117.1, APD51481.1, AYR18399.1, QEH62668.1, ADX59465.1, AID16674.1, BBA21167.1, ADX59501.1, QED88031.1, QBP43266.1, QCX35159.1, AVY53334.1, ATP66783.1, ATP66788.1, QER90703.1, AIA62270.1, AZF86129.1, AHM88216.1, YP_009201729.1, ALK43113.1, AIA62199.1, NP_073549.1, QBP43288.1, YP_009199608.1, ASF90459.1, ADX59494.1, YP_009019180.1 | 510                                   |
| cd21659                         | betaCoV_Nsp14<br>(nonstructural protein 14 of betacoronavirus)   | YP_009555238.1, YP_173236.1, YP_009047202.1, YP_007188577.3, YP_009724389.1, APO40578.1, NP_828849.7, ADY69164.1, ASU45783.1, YP_009072438.1,                                                                                                                                                                                                                                                                                                                                                                                                                         | 519                                   |

|         |                                                                     |                                                                                                                                                                                                                                                                                                                                                                                                          |     |
|---------|---------------------------------------------------------------------|----------------------------------------------------------------------------------------------------------------------------------------------------------------------------------------------------------------------------------------------------------------------------------------------------------------------------------------------------------------------------------------------------------|-----|
|         |                                                                     | AGT28265.1, AOG30811.1,<br>ABN10934.1, AWV67063.1,<br>ATP66748.1, ATP66731.1,<br>BAS18842.1, BAS18842.1,<br>AUM60013.1, AIA62342.1,<br>BBJ36006.1, ASL68951.1,<br>AVV62535.1, ADM33557.1,<br>QGA70691.1, AVP25405.1,<br>YP_003858583.1, ADX59481.1,<br>APO40578.1, ATP66725.1,<br>ATP66760.1, AYR18613.1,<br>AYR18596.1, AID16659.1,<br>ATP66742.1, AAA46458.2,<br>AIA62351.1, AZU96325.1,<br>QDF43839.1 |     |
| cd21658 | gammaCoV_Nsp14<br>(nonstructural protein 14<br>of gammacoronavirus) | YP_009825006.1,<br>YP_001941164.2, QCB65096.1,<br>AHB63507.1, AIG54293.1,<br>APP92727.1, QDQ69197.1,<br>CEK09107.1, ABW75124.1,<br>QDA76254.1, AXQ05189.1,<br>ALQ43514.1, ABW75136.1,<br>QDY92334.1, AKQ98488.1                                                                                                                                                                                          | 518 |
| cd21657 | deltaCoV_Nsp14<br>(nonstructural protein 14<br>of deltacoronavirus) | ACJ12043.1, YP_005352862.1,<br>BBC54821.1, YP_005352870.1,<br>YP_002308505.1, AXP20280.1,<br>YP_005352853.1,<br>YP_005352837.1, AWV67124.1,<br>BBC54851.1, YP_002308496.1,<br>AVR48517.1, AWV96579.1,<br>ABQ39957.1, AWV96586.1                                                                                                                                                                          | 508 |

**Table S19.** Sequences included to obtain consensus sequence the non-structural protein of coronavirus

| Non structural protein  | Conserved Protein Domain Family                                                                  | Dominio Conservado (CDD) | Accession number                                                                                                                                                                                                                                                                                                                                                                                                                                                                                                                      | Length sequence consensus (aa) |
|-------------------------|--------------------------------------------------------------------------------------------------|--------------------------|---------------------------------------------------------------------------------------------------------------------------------------------------------------------------------------------------------------------------------------------------------------------------------------------------------------------------------------------------------------------------------------------------------------------------------------------------------------------------------------------------------------------------------------|--------------------------------|
| <i>Alphacoronavirus</i> |                                                                                                  |                          |                                                                                                                                                                                                                                                                                                                                                                                                                                                                                                                                       |                                |
| Nsp3                    | alphaCoV_PLPro (alphacoronavirus papain-like protease)                                           | cd21731                  | YP_003766.2, NP_073549.1, ALK43113.1, YP_009380519.1, APD51481.1, P0C6X5.1, ALK43114.1, P0C6X1.1, AYR18429.1, AYH64860.2, QER90703.1, AOV85633.1, QBP43277.1, QDF43809.1, QCX35166.1, P0C6V6.1, AIA62211.1, AIA62270.1, ABI14446.1, ASU62498.1, AMD11206.1, AZF86129.1, ASL24651.1, ADI80521.1, ASF90485.1, AIA62233.1, AZF86117.1, YP_009201729.1, AVY53334.1, AFU92112.1, ASL24650.1, AFU92077.1, AFH58022.1, BBA21166.1, YP_009380519.1                                                                                            | 289                            |
| Nsp5                    | alphaCoV_Nsp5_Mpro (alphacoronavirus non-structural protein 5, also called Main protease (Mpro)) | cd21665                  | NP_073549.1, YP_003766.2, 5GWY_A, 3TLO_A, 1LVO_A, 5NH0_A, 2ZU2_A, 1P9S_A, 5EU8_A, 4F49_A, 5ZQG_A, 4ZRO_A, ASF90469.1, QER90703.1, AID16674.1, AIA62211.1, AFU92103.1, AID16670.1, ASR18936.1, QCX35159.1, ADI80522.1, AID16673.1, APD51489.1, AZF86129.1, ABQ57215.1, AZF86117.1, AIA62270.1, AJP67437.1, ASL24651.1, ATP66788.1, ATP66783.1, QBP43277.1                                                                                                                                                                              | 296                            |
| Nsp6                    | alphaCoV-Nsp6 (alphacoronavirus non-structural protein 6)                                        | cd21558                  | NP_073549.1, YP_003766.2, ANA96047.1, AID16670.1, AIA62270.1, QBP43254.1, AFU92103.1, ALK43113.1, YP_009328933.1, APD51481.1, AYR18486.1, AID16674.1, QER90703.1, QCX35177.1, QBP43266.1, QBP43288.1, YP_009199608.1, ACA52156.1, ASL24651.1, ARI44793.1, QCX35159.1, AIA62233.1, AID16673.1, AVM80482.1, AIA62211.1, YP_009201729.1, ADI80522.1, AZF86117.1, AZF86129.1, ATP66737.1, YP_009380519.1, ACT10853.1, ATP66783.1, AVM87573.1, ASF90443.1, ASF90485.1, ASF90469.1                                                          | 293                            |
| Nsp9                    | CoV-Nsp9 (coronavirus non-structural protein 9)                                                  | cd21897                  | YP_003766.2, NP_073549.1, AID16671.1, ASF90443.1, ASL24651.1, AZF86129.1, YP_009201729.1, ANA96047.1, QBP43288.1, AZF86117.1, QBP43266.1, AID16669.1, QCX35166.1, AOG74788.1, AFU92077.1, AID16674.1, APD51505.1, APD51497.1, ALK43115.1, ALK43113.1, AJP67413.1, ACI13472.1, QER90703.1, ACI13440.1, APD51489.1, AYH64861.2, QCX35159.1, AID16673.1, ARI44793.1, AYR18560.1, AYR18498.1, QDM36985.1, YP_009200734.1, AVM80473.1, AID16670.1, ASF90459.1, AGZ84525.1, ASF90469.1, ACT10915.1, YP_009256195.1, BBA21166.1, ATP66737.1, | 108                            |

|                               |                                                                                         |         |                                                                                                                                                                                                                                                                                                                                                                                                                                                                                                                                                                                                                                                                                                                                                                                                    |     |
|-------------------------------|-----------------------------------------------------------------------------------------|---------|----------------------------------------------------------------------------------------------------------------------------------------------------------------------------------------------------------------------------------------------------------------------------------------------------------------------------------------------------------------------------------------------------------------------------------------------------------------------------------------------------------------------------------------------------------------------------------------------------------------------------------------------------------------------------------------------------------------------------------------------------------------------------------------------------|-----|
|                               |                                                                                         |         | YP_009380519.1, QDF43809.1, AIA62211.1, AIA62226.1, AIA62205.1, ACA52156.1, AVY53334.1                                                                                                                                                                                                                                                                                                                                                                                                                                                                                                                                                                                                                                                                                                             |     |
| Nsp12*                        | alphaCoV_RdRp                                                                           | cd21588 | YP_003766.2, NP_073549.1, AVA26872.1, AIA62219.1, AXE71622.1, ADX59465.1, ADX59457.1, QBP43277.1, QCX35166.1, AZF86117.1, QDF43809.1, YP_009201729.1, AIA62270.1, YP_009199608.1, AIA62199.1, ASF90474.1, ASF90495.1, ASF90459.1, ASF90443.1, ARI44788.1, AID16673.1, APD51489.1, AFU92130.1, AMC39583.1, QBP43288.1, AKJ21970.1, AZF86129.1, Q98VG9.2 (R1AB_FIPV), ANA96047.1, P0C6Y5.1 (R1AB_CVPPU), AJO27002.1, AVY53334.1, AYR18560.1, QCX35159.1, ABQ57215.1, ALK43113.1, ADX59494.1, APD51505.1, AIA62211.1, AYF53092.1, YP_009328933.1, YP_009256195.1, ADX59487.1, AID16670.1, AMB42807.1, AID16669.1, AKZ66481.1, ACA52156.1, QDF43789.1, AYH64861.2, NP_073549.1, AID16547.1, ASL24651.1, QER90703.1, ADX59501.1, ABB77038.1, QBM00060.1, AQK38167.1, ATP66737.1, ATP66788.1, ATP66783.1 | 924 |
| Nsp13                         | alphaCoV_Nsp13-helicase (helicase domain of alphacoronavirus non-structural protein 13) | cd21723 | NP_073549.1, YP_003766.2, P0C6X5.1, QBP43288.1, APD51489.1, YP_009328933.1, QDF43809.1, AIA62199.1, AFU92112.1, ADX59465.1, ADX59494.1, AYR18560.1, AEK25510.1, ADX59501.1, QER90703.1, AYH64861.2, ADX59457.1, ARI44788.1, ADX59487.1, AVY53334.1, AIA62270.1, BAV31348.1, ATP66737.1, ABB77061.1, AVM80473.1, ASL24651.1, AIA62233.1, AZF86117.1, AKZ66481.1, YP_009201729.1, ABO88147.1, YP_009380520.1, AYR18518.1, AID16669.1, ASF90474.1, ATP66783.1                                                                                                                                                                                                                                                                                                                                         | 340 |
| Nsp14                         | alphaCoV_Nsp14 (nonstructural protein 14 of alphacoronavirus)                           | cd21660 | NP_073549.1, YP_003766.2, YP_009380520.1, ACA52156.1, AID16673.1, AFU92103.1, YP_009328933.1, ANA96047.1, ASL24651.1, AIA62233.1, AYR18435.1, ADR79379.1, AYH64858.2, AID16669.1, APD51497.1, ADX59457.1, AZF86123.1, AZF86117.1, APD51481.1, AYR18399.1, QEH62668.1, ADX59465.1, AID16674.1, BBA21167.1, ADX59501.1, QED88031.1, QBP43266.1, QCX35159.1, AVY53334.1, ATP66783.1, ATP66788.1, QER90703.1, AIA62270.1, AZF86129.1, AHM88216.1, YP_009201729.1, ALK43113.1, AIA62199.1, NP_073549.1, QBP43288.1, YP_009199608.1, ASF90459.1, ADX59494.1, YP_009019180.1                                                                                                                                                                                                                              | 510 |
| <b><i>Betacoronavirus</i></b> |                                                                                         |         |                                                                                                                                                                                                                                                                                                                                                                                                                                                                                                                                                                                                                                                                                                                                                                                                    |     |
| Nsp3                          | betaCoV_PLPro                                                                           | cd21732 | YP_009555238.1, YP_173236.1, NP_828862.2, YP_009725299.1, YP_009047215.1, YP_009944294.1, YP_001941176.1, YP_001941176.1                                                                                                                                                                                                                                                                                                                                                                                                                                                                                                                                                                                                                                                                           | 304 |

|        |                                                                                                   |         |                                                                                                                                                                                                                                                                                                                                                                                                                                                       |     |
|--------|---------------------------------------------------------------------------------------------------|---------|-------------------------------------------------------------------------------------------------------------------------------------------------------------------------------------------------------------------------------------------------------------------------------------------------------------------------------------------------------------------------------------------------------------------------------------------------------|-----|
|        | (betacoronavirus papain-like protease)                                                            |         | YP_009555258.1, YP_009924321.1, YP_009742610.1, YP_009725299.1, YP_009742610.1, NP_828862.2, YP_009944368.1, YP_460024.1, YP_009944271.1, YP_009047215.1, YP_009047231.1, YP_009944294.1, YP_009944283.1, 3MJ5_A, QHD43415.1, 3MJ5_A, 5W8T_A, 4REZ_A, AYR18613.1, AVV62524.1, AVV62535.1, AYR18649.1, AUM60013.1, APO40578.1, AIG13097.1, AJA91204.1                                                                                                  |     |
| Nsp5   | betaCoV_Nsp5_Mpro<br>(betacoronavirus non-structural protein 5, also called Main protease (Mpro)) | d21666  | <p> APO40578.1, YP_009725301.1, NP_828849.7, YP_009924323.1, YP_009944273.1, YP_009047217.1, YP_009944296.1, 3D23_B, 6M2N_A, 6JIJ_B, 2A5K_A, 1WOF_A, 3ATW_A, 4MDS_A, 4YLU_A, 5WKJ_A, 1Q2W_A, 1UJ1_A, 1Z1J_A, 2PWX_A, 2Q6G_A, 3E91_A, 3M3T_A, 4HI3_A, 5B6O_A, AID16629.1, AGT28265.1, QGA70691.1, AOG30811.1, ADY69163.1, YP_009072438.1, AWV67038.1, 6JIJ_B, 2YNA </p>                                                                                | 297 |
| Nsp6   | betaCoV-Nsp6<br>(betacoronavirus non-structural protein 6)                                        | cd21560 | <p> YP_009555238.1, YP_173236.1, YP_009047202.1, YP_007188577.3, YP_009724389.1, NP_828849.7, APO40578.1, YP_009742613.1, ATP66760.1, ASL68951.1, YP_009361855.1, APO40578.1, ATQ39389.1, AUM60023.1, AVV62524.1, YP_003858583.1, ATP66754.1, AYR18613.1, BBJ36006.1, ATP66777.1, ABN10918.1, ADM33573.1, QEH60462.1, QGA70691.1, AOG30811.1, AWV67038.1, ADY69163.1, AJA91204.1, AFE48810.1, ATP66742.1, AGT28265.1, AVP25405.1, YP_009072438.1 </p> | 290 |
| Nsp9   | betaCoV_Nsp9<br>(betacoronavirus non-structural protein 9)                                        | cd21898 | <p> YP_009555238.1, YP_173236.1, YP_009047202.1, YP_007188577.3, YP_009724389.1, NP_828849.7, APO40578.1, YP_009072438.1, BBJ36006.1, ASL68940.1, ANA96038.1, AVV62524.1, AVV62535.1, ABN10918.1, QGA70691.1, QEH60462.1, AVP25405.1, AGT28265.1, AOG30811.1, AWV67038.1, AID16712.1, ATP66754.1, ATP66760.1, ATP66742.1, ATP66748.1, ATP66777.1, ATP66731.1, AZU96324.1 </p>                                                                         | 111 |
| Nsp12* | betaCoV_RdRp                                                                                      | cd21589 | <p> NP_073549.1, YP_009944302.1, YP_009725307.1, NP_828849.7, APO40578.1, YP_009555260.1, YP_459941.1, 7BTF_A, P0C6X4.1 (R1AB_CVHN5), YP_009072438.1, ATQ39389.1, ABN10934.1 </p>                                                                                                                                                                                                                                                                     | 929 |
| Nsp13  | betaCoV_Nsp13-helicase (helicase domain of betacoronavirus non-structural protein 13)             | cd21722 | <p> YP_009555238.1, YP_459942.1, YP_009047224.1, YP_009944303.1, YP_009725308.1, APO40578.1, NP_828849.7, QHD43415.1, AUM60023.1, AYR18640.1, AYR18613.1, 6JYT_A, 5WWP_B, ADY69164.1, QDF43839.1, YP_009072438.1, AOG30811.1, BBJ36006.1, ABN10892.1, AUM60023.1, ADX59473.1, QGA70691.1, QCC20711.1, ATP66731.1, AYR18596.1, ATP66742.1, AFE48822.1 </p>                                                                                             | 340 |

|                         |                                                                                                               |         |                                                                                                                                                                                                                                                                                                                                                                                                                                                                                                                                                             |     |
|-------------------------|---------------------------------------------------------------------------------------------------------------|---------|-------------------------------------------------------------------------------------------------------------------------------------------------------------------------------------------------------------------------------------------------------------------------------------------------------------------------------------------------------------------------------------------------------------------------------------------------------------------------------------------------------------------------------------------------------------|-----|
| Nsp14                   | betaCoV_Nsp14<br>(nonstructural protein 14<br>of betacoronavirus)                                             | cd21659 | YP_009555238.1, YP_173236.1, YP_009047202.1, YP_007188577.3,<br>YP_009724389.1, APO40578.1, NP_828849.7, ADY69164.1,<br>ASU45783.1, YP_009072438.1, AGT28265.1, AOG30811.1,<br>ABN10934.1, AWV67063.1, ATP66748.1, ATP66731.1, BAS18842.1,<br>BAS18842.1, AUM60013.1, AIA62342.1, BBJ36006.1, ASL68951.1,<br>AVV62535.1, ADM33557.1, QGA70691.1, AVP25405.1,<br>YP_003858583.1, ADX59481.1, APO40578.1, ATP66725.1,<br>ATP66760.1, AYR18613.1, AYR18596.1, AID16659.1, ATP66742.1,<br>AAA46458.2, AIA62351.1, AZU96325.1, QDF43839.1                        | 519 |
| <i>Gammacoronavirus</i> |                                                                                                               |         |                                                                                                                                                                                                                                                                                                                                                                                                                                                                                                                                                             |     |
| Nsp3                    | gammaCoV_PLPro<br>(gammacoronavirus<br>papain-like protease)                                                  | cd21733 | YP_009825031.1, YP_001941176.1, AHB63480.1, YP_001876435.1,<br>ABW75136.1, APP92719.1, QDA76254.1, AVI69518.1, ADV71748.1,<br>CEK09107.1, QDY92334.1, QCB65096.1, QDQ69120.1, ACV87256.1,<br>QDQ69094.1, AQY55829.1, AXB38893.1, ARJ35781.1, ADV71811.1,<br>ALQ43513.1, AKF17723.1, ACV87267.1                                                                                                                                                                                                                                                              | 304 |
| Nsp5                    | gammaCoV_Nsp5_Mpro<br>(gammacoronavirus non-<br>structural protein 5, also<br>called Main protease<br>(Mpro)) | cd21667 | YP_009825033.1, YP_001941178.1, 2Q6D_A, QCE31532.1,<br>AAW33784.1, AZP23929.1, AHB63507, QCB65096.1, AKQ98469.1,<br>AKQ98473.1, NP_040829.1, NP_066134.1, QEG79146.1, ALQ43513.1,<br>CAC39112.1, ACV87243.1, ANY58999.1, ARJ35781.1, QDA76254.1,<br>QDA76263.1, ABW75124.1, ARJ35790.1, CAZ86698.1, CAZ86697.1,<br>CEK09106.1, NP_740623.1, AKQ98471.1, AKF17722.1, ATE90965.1,<br>ATE90966.1, QCB65092.1, YP_001941178.1, AHB63480.1,<br>YP_001876436.1, AXF38647.1                                                                                        | 306 |
| Nsp6                    | gammaCoV-Nsp6                                                                                                 | cd21559 | YP_009825007.1, YP_001941164.2, QDY92358.1, QDY92334.1,<br>QEG79146.1, QCB65096.1, AHB63480.1, QDQ69197.1, QDQ69171.1                                                                                                                                                                                                                                                                                                                                                                                                                                       | 307 |
| Nsp9                    | gammaCoV_Nsp9<br>(gammacoronavirus non-<br>structural protein 9)                                              | cd21899 | YP_009825037.1, YP_001941182.1, AHB63480.1, AFJ11174.1,<br>QCB65092.1, AGK85497.1, ARS22408.1, AEP84744.1, QDY92334.1,<br>ADV71798.1, QDA76290.1                                                                                                                                                                                                                                                                                                                                                                                                            | 113 |
| Nsp12*                  | gammaCoV_RdRp                                                                                                 | cd21587 | YP_459941.1, YP_009825029.1, AHB73997.1, P0C6Y3.1 (R1AB_IBVM),<br>AVI69484.1, ACH72802.1, P0C6Y1.1 (R1AB_IBVB), ACC94324.1,<br>ABW75136.1, AKQ98476.1, AAP92673.1, ACV87266.1, QDA76263.1,<br>ARB66179.1, AXB38892.1, APZ73705.1, ARS23151.1, AIG54294.1,<br>AOC59721.1, QDY92334.1, AAQ21583.1, AMD40261.1, AXT92414.1,<br>QDQ69132.1, QDQ69106.1, APP92719.1, QDQ69145.1, AKQ98478.1,<br>QDQ69158.1, AGW81826.1, AKF17722.1, ARJ35781.1, AJT47940.1,<br>AGK85497.1, APY23514.1, APP92727.1, QCB65096.1, CAA83018.1,<br>AKV63203.1, AVI69518.1, AHB63507.1 | 931 |

|                                |                                                                                                  |         |                                                                                                                                                                                                                                                                                                                                |     |
|--------------------------------|--------------------------------------------------------------------------------------------------|---------|--------------------------------------------------------------------------------------------------------------------------------------------------------------------------------------------------------------------------------------------------------------------------------------------------------------------------------|-----|
| Nsp13                          | gammaCoV_Nsp13-helicase (helicase domain of gammacoronavirus non-structural protein 13)          | cd21720 | YP_009825025.1, YP_001941186.1, AHB63507.1, AKF17722.1, QCB65096.1, AGK85497.1, AKQ98482.1, APY26727.1, ADP06517.1, ADV71748.1, AKV63203.1                                                                                                                                                                                     | 343 |
| Nsp14                          | gammaCoV_Nsp14 (nonstructural protein 14 of gammacoronavirus)                                    | cd21658 | YP_009825006.1, YP_001941164.2, QCB65096.1, AHB63507.1, AIG54293.1, APP92727.1, QDQ69197.1, CEK09107.1, ABW75124.1, QDA76254.1, AXQ05189.1, ALQ43514.1, ABW75136.1, QDY92334.1, AKQ98488.1                                                                                                                                     | 518 |
| <b><i>Deltacoronavirus</i></b> |                                                                                                  |         |                                                                                                                                                                                                                                                                                                                                |     |
| Nsp3                           | deltaCoV_PLPro (deltacoronavirus papain-like protease)                                           | cd21734 | QDH76194.1, YP_005352853.1, AXP32229.1, AWV96579.1, ATJ00129.1, BAZ95608.1, YP_005352845.1, AWV67124.1, AWV67133.1, BBC54860.1, BBC54851.1, AXP20280.1, YP_002308505.1, ACJ12043.1, YP_002308496.1, BBC54841.1, BBC54831.1, BBC54821.1, YP_005352862.1, AWR88311.1, AUG59154.1, YP_005352837.1, YP_005352880.1, YP_005352870.1 | 313 |
| Nsp5                           | deltaCoV_Nsp5_Mpro (deltacoronavirus non-structural protein 5, also called Main protease (Mpro)) | cd21668 | BBC54821.1, YP_005352862.1, AWR88311.1, APZ76696.1, ACJ12043.1, YP_005352880.1, YP_005352870.1                                                                                                                                                                                                                                 | 302 |
| Nsp6                           | deltaCoV-Nsp6                                                                                    | cd21561 | YP_009513020.1, YP_005352837.1, YP_005352880.1, AMN91620.1, YP_002308505.1, BBC54821.1, AWV67106.1, YP_002308496.1, ACJ12043.1, YP_002308478.1, AWV67124.1, YP_005352845.1, YP_005352853.1, AXP20280.1, AWR88311.1, YP_005352870.1                                                                                             | 296 |
| Nsp9                           | deltaCoV_Nsp9 (deltacoronavirus non-structural protein 9)                                        | cd21900 | YP_005352862.1, AWR88311.1, AXP20280.1, AWV67124, YP_002308505, ACJ12043                                                                                                                                                                                                                                                       | 109 |
| Nsp12*                         | deltaCoV_RdRp                                                                                    | cd21590 | AWV67106.1, AWV67124.1, BBC54860.1, ANI85845.1, ACJ12043.1, BBC54841.1, YP_002308496.1, AWV67133.1, YP_002308505.1, AXP20280.1, AML40817.1, BBC54831.1, ASR75138.1, YP_005352845.1, AMN91620.1, BBC54851.1, YP_005352862.1, YP_005352853.1, YP_005352837.1, YP_005352880.1, YP_002308478.1, YP_005352870.1, AWV96565.1         | 928 |

|       |                                                                                         |         |                                                                                                                                                                                                            |     |
|-------|-----------------------------------------------------------------------------------------|---------|------------------------------------------------------------------------------------------------------------------------------------------------------------------------------------------------------------|-----|
| Nsp13 | deltaCoV_Nsp13-helicase (helicase domain of deltacoronavirus non-structural protein 13) | cd21721 | ACJ12043.1, YP_002308496.1, YP_005352837.1, YP_002308505.1, YP_005352880.1, BBC54821.1, AWW67106.1, YP_005352870.1, YP_005352862.1, AWR88314.1                                                             | 342 |
| Nsp14 | deltaCoV_Nsp14 (nonstructural protein 14 of deltacoronavirus)                           | cd21657 | ACJ12043.1, YP_005352862.1, BBC54821.1, YP_005352870.1, YP_002308505.1, AXP20280.1, YP_005352853.1, YP_005352837.1, AWW67124.1, BBC54851.1, YP_002308496.1, AVR48517.1, AWW96579.1, ABQ39957.1, AWW96586.1 | 508 |

\*Accession number of viral representatives of each taxonomic group was obtained from the NCBI (Conserved Protein Domain Family) database.



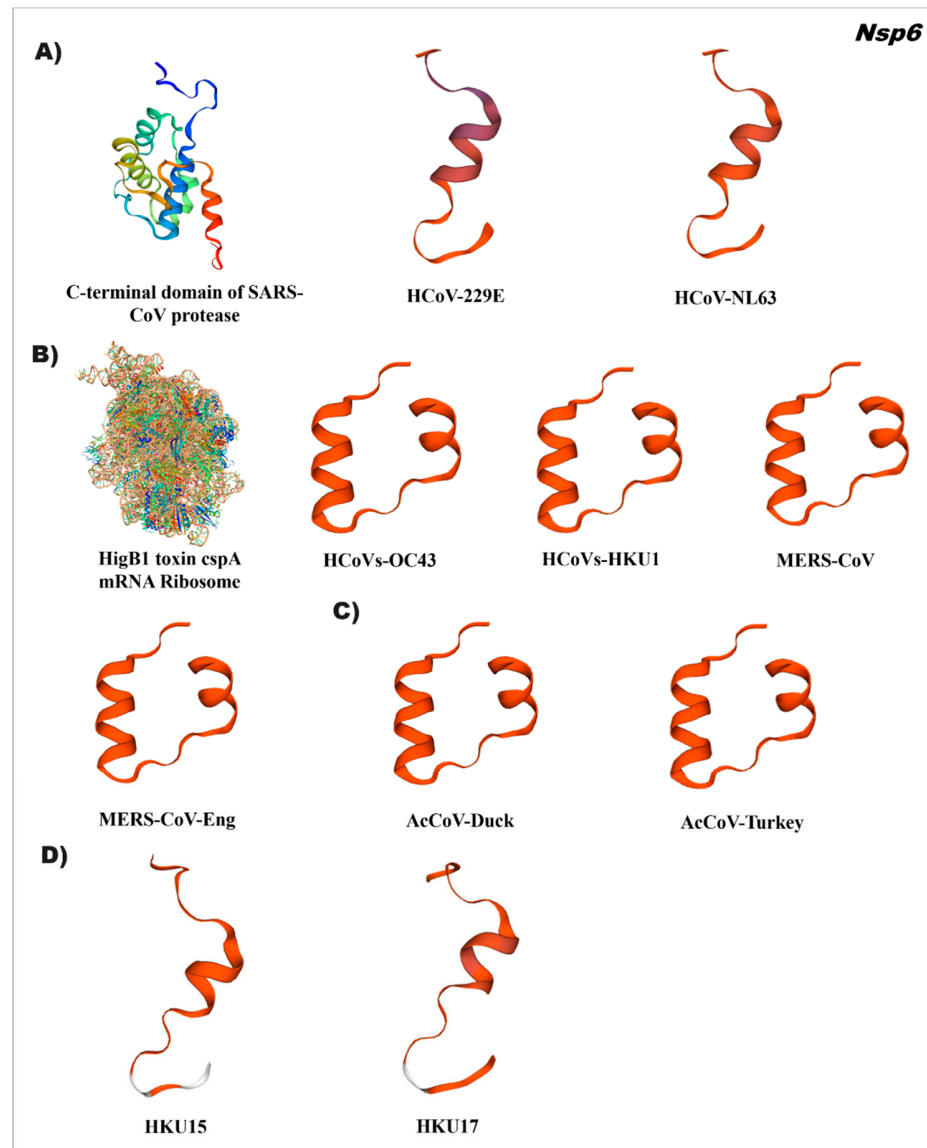

**Supplementary Figure 1.** Tertiary structure in silico of partial C-terminal of the Nsp6 of the coronavirus genus alpha, beta, gamma and delta. The prediction of the tertiary conformation was made using the SWISSMODEL program and the ID corresponding to each virus genus was used as a reference. **A)** Alphacoronavirus: HCoV-229E (NP\_073549.1), HCoV-NL63 (YP\_003766.2); **B)** Betacoronavirus: HCoV-OC43 (YP\_009555238.1), HCoV-HKU1 (YP\_173236.1), MERS-CoV (YP\_009047202.1), MERS-CoV-Eng (YP\_007188577.3); **C)** Gammacoronavirus: AcCoV-Duck (YP\_009825007.1), AcCoV-Turkey (YP\_001941164.2); **D)** Deltacoronavirus: Porcine coronavirus HKU15 (QWE80491.1), Sparrow deltacoronavirus HKU17 (AWV67106.1). Reference ID: 2K7x.1 (Alphacoronavirus and Deltacoronavirus), 7nbu.1 (Betacoronavirus and Gammacoronavirus). Tertiary structures were made using SWISS MODEL software.
